# Supplementary material
Source: HighWire-hosted journal article supplement (http://molpharm.aspetjournals.org/highwire/filestream/76927/field_highwire_adjunct_files/1/MOL73627__Supplementary_Figure_CORRECTED.pdf)
Supplement: MOL73627__Supplementary_Figure_CORRECTED.pdf [file MOL73627__Supplementary_Figure_CORRECTED.pdf]

**Novel thiosemicarbazone iron chelators induce up-regulation and phosphorylation of the metastasis suppressor, NDRG1: A new strategy for the treatment of pancreatic cancer.**

Zaklina Kovacevic, Sherin Chikhani, David B. Lovejoy and Des R. Richardson

Molecular Pharmacology

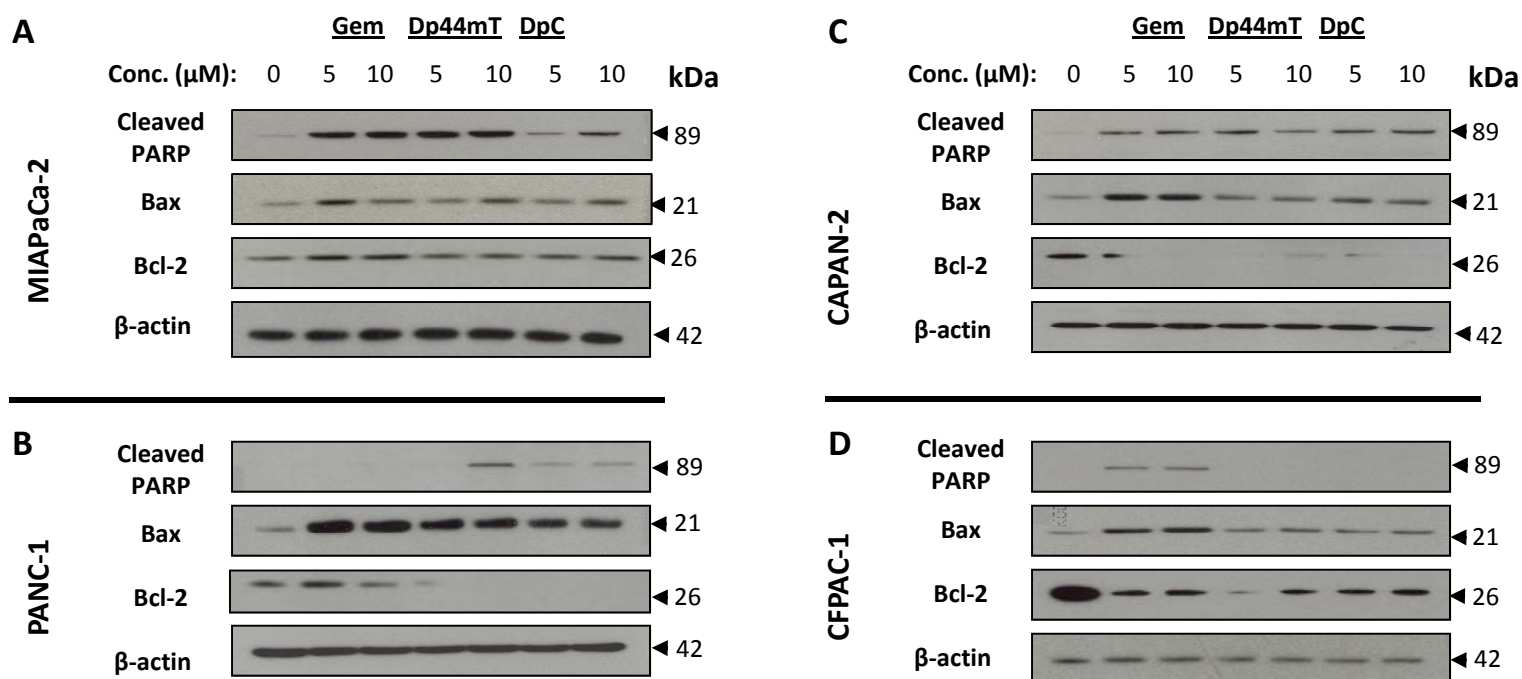

**Supplementary Figure 1: Effect of gemcitabine (Gem), Dp44mT and DpC on markers of apoptosis in pancreatic cancer cell-types after a 48 h incubation.** The pancreatic cancer cell types MIAPaCa-2, PANC-1, CAPAN-2 and CFPAC-1 were incubated with 5 or 10 μM of either Gem, Dp44mT or DpC for 48 h and the apoptotic markers, namely cleaved PARP, Bax and Bcl-2, were examined by western analysis. Results are typical of 3 experiments performed.
